# Supplementary material
Source: publisher site journal article supplement (https://www.dovepress.com/article/552619)
Supplement: Supplementary file 1 [file Supplementary%20Material.docx]

| Table S1. All SNP information was summarised in this study. | | | | | | | | | | | | | | | | | | | | | | |
| --- | --- | --- | --- | --- | --- | --- | --- | --- | --- | --- | --- | --- | --- | --- | --- | --- | --- | --- | --- | --- | --- | --- |
| SNP | effect allele | other allele | chr | pos |  | Exposure | | | |  | Outcome | | | |  | id.outcome | id.exposure | steiger_dir | steiger_pval | R2 | F |
|  | beta | eaf | se | pval |  | beta | eaf | se | pval |  |
| rs13322435 | A | G | 3 | 156795468 |  | -0.0645 | 0.5887 | 0.0101821 | 1.10E-09 |  | 0.0007 | 0.6274 | 0.0218 | 0.9727 |  | GCST90454205 | GCST90205221 | TRUE | 9.49E-10 | 0.20% | 38.85 |
| rs1500714 | C | G | 3 | 56901687 |  | 0.0808 | 0.8537 | 0.0145638 | 1.00E-08 |  | -0.0407 | 0.8063 | 0.0273 | 0.1367 |  | GCST90454205 | GCST90205221 | TRUE | 5.77E-07 | 0.16% | 31.50 |
| rs1962883 | C | T | 9 | 107722705 |  | -0.0618 | 0.5280 | 0.0101755 | 8.80E-09 |  | 0.0103 | 0.5159 | 0.0244 | 0.6738 |  | GCST90454205 | GCST90205221 | TRUE | 7.99E-09 | 0.19% | 36.70 |
| rs56006999 | C | T | 1 | 204430834 |  | 0.0760 | 0.8214 | 0.013021 | 2.20E-08 |  | 0.0217 | 0.7820 | 0.0257 | 0.3987 |  | GCST90454205 | GCST90205221 | TRUE | 5.28E-08 | 0.17% | 32.75 |
| rs577721086 | T | C | 6 | 127440047 |  | -0.1588 | 0.9519 | 0.0234524 | 2.30E-11 |  | -0.1118 | 0.9417 | 0.0473 | 0.0181 |  | GCST90454205 | GCST90205221 | TRUE | 2.48E-09 | 0.23% | 44.61 |
| rs672457 | G | A | 6 | 139836562 |  | 0.0771 | 0.4075 | 0.0101152 | 1.10E-13 |  | 0.0248 | 0.4561 | 0.0215 | 0.2476 |  | GCST90454205 | GCST90205221 | TRUE | 1.36E-12 | 0.29% | 55.50 |
| rs73221948 | G | T | 8 | 25464670 |  | 0.0940 | 0.7081 | 0.011461 | 3.10E-16 |  | -0.0149 | 0.7415 | 0.0256 | 0.5600 |  | GCST90454205 | GCST90205221 | TRUE | 6.83E-15 | 0.37% | 70.61 |
| rs9273073 | T | C | 6 | 32612279 |  | -0.0677 | 0.7044 | 0.0116857 | 1.30E-08 |  | 0.0001 | 0.7670 | 0.0255 | 0.9956 |  | GCST90454205 | GCST90205221 | TRUE | 2.09E-08 | 0.19% | 36.84 |
| rs9863 | T | C | 12 | 124421453 |  | 0.0751 | 0.6720 | 0.0105712 | 5.40E-12 |  | 0.0264 | 0.6837 | 0.0228 | 0.2475 |  | GCST90454205 | GCST90205221 | TRUE | 4.58E-11 | 0.25% | 48.01 |
| rs3936510 | G | T | 5 | 55860866 |  | -0.0982 | 0.8006 | 0.0125105 | 2.50E-14 |  | -0.0784 | 0.8635 | 0.0308 | 0.0110 |  | GCST90454205 | GCST90205222 | TRUE | 3.50E-12 | 0.31% | 59.47 |
| rs4731702 | C | T | 7 | 130433384 |  | -0.0819 | 0.5149 | 0.00999874 | 9.00E-17 |  | 0.0413 | 0.5233 | 0.0213 | 0.0531 |  | GCST90454205 | GCST90205222 | TRUE | 9.97E-14 | 0.34% | 64.79 |
| rs998584 | C | A | 6 | 43757896 |  | -0.0678 | 0.5171 | 0.0100949 | 8.90E-11 |  | 0.0048 | 0.5134 | 0.0213 | 0.8230 |  | GCST90454205 | GCST90205222 | TRUE | 1.20E-10 | 0.23% | 44.28 |
| rs114078082 | G | A | 6 | 34146811 |  | 0.1798 | 0.9576 | 0.0247422 | 1.50E-12 |  | -0.0063 | 0.9733 | 0.0621 | 0.9191 |  | GCST90454205 | GCST90205223 | TRUE | 2.47E-12 | 0.26% | 50.64 |
| rs12814794 | G | A | 12 | 26440698 |  | -0.0949 | 0.2492 | 0.011478 | 3.90E-16 |  | 0.0034 | 0.3130 | 0.0228 | 0.8819 |  | GCST90454205 | GCST90205223 | TRUE | 1.70E-15 | 0.34% | 65.14 |
| rs17326656 | G | T | 2 | 48962291 |  | 0.0693 | 0.7614 | 0.0117126 | 1.10E-09 |  | 0.0090 | 0.8270 | 0.0277 | 0.7460 |  | GCST90454205 | GCST90205223 | TRUE | 1.63E-08 | 0.17% | 33.71 |
| rs1872113 | G | A | 3 | 129322824 |  | -0.0657 | 0.7780 | 0.0120746 | 3.60E-08 |  | -0.0454 | 0.8124 | 0.0278 | 0.1030 |  | GCST90454205 | GCST90205223 | TRUE | 1.18E-06 | 0.15% | 28.78 |
| rs1962883 | C | T | 9 | 107722705 |  | 0.0607 | 0.5280 | 0.0101724 | 1.20E-08 |  | 0.0103 | 0.5159 | 0.0244 | 0.6738 |  | GCST90454205 | GCST90205223 | TRUE | 1.46E-08 | 0.18% | 35.41 |
| rs2820446 | C | G | 1 | 219748818 |  | -0.0663 | 0.7027 | 0.0108842 | 9.90E-10 |  | 0.0395 | 0.7240 | 0.0240 | 0.1004 |  | GCST90454205 | GCST90205223 | TRUE | 4.15E-08 | 0.18% | 35.46 |
| rs2925979 | T | C | 16 | 81534790 |  | -0.0674 | 0.2966 | 0.0108574 | 2.70E-09 |  | 0.0241 | 0.3011 | 0.0241 | 0.3167 |  | GCST90454205 | GCST90205223 | TRUE | 8.73E-09 | 0.19% | 36.55 |
| rs2943653 | C | T | 2 | 227047771 |  | 0.0592 | 0.3273 | 0.0105563 | 8.60E-09 |  | -0.0330 | 0.3439 | 0.0225 | 0.1419 |  | GCST90454205 | GCST90205223 | TRUE | 4.12E-07 | 0.15% | 29.82 |
| rs2982521 | A | T | 6 | 139835329 |  | -0.0652 | 0.3702 | 0.01029 | 1.10E-09 |  | 0.0241 | 0.4123 | 0.0217 | 0.2667 |  | GCST90454205 | GCST90205223 | TRUE | 4.82E-09 | 0.20% | 38.27 |
| rs3936511 | A | G | 5 | 55860781 |  | 0.1196 | 0.8109 | 0.0126725 | 4.80E-19 |  | -0.0764 | 0.8646 | 0.0309 | 0.0133 |  | GCST90454205 | GCST90205223 | TRUE | 1.69E-17 | 0.44% | 84.98 |
| rs56271783 | G | C | 11 | 64004723 |  | 0.1581 | 0.9536 | 0.0239502 | 2.30E-11 |  | -0.0242 | 0.9580 | 0.0605 | 0.6898 |  | GCST90454205 | GCST90205223 | TRUE | 3.17E-10 | 0.22% | 42.73 |
| rs7133378 | G | A | 12 | 124409502 |  | -0.1196 | 0.6800 | 0.0105915 | 4.20E-27 |  | 0.0415 | 0.7070 | 0.0233 | 0.0746 |  | GCST90454205 | GCST90205223 | TRUE | 1.16E-25 | 0.62% | 120.67 |
| rs72959041 | G | A | 6 | 127454893 |  | 0.2054 | 0.9521 | 0.0235367 | 2.20E-17 |  | -0.1111 | 0.9416 | 0.0472 | 0.0187 |  | GCST90454205 | GCST90205223 | TRUE | 3.96E-15 | 0.38% | 74.42 |
| rs7592412 | T | C | 2 | 165526338 |  | -0.0987 | 0.6521 | 0.0104369 | 2.50E-20 |  | 0.0018 | 0.6582 | 0.0222 | 0.9347 |  | GCST90454205 | GCST90205223 | TRUE | 7.03E-20 | 0.44% | 85.55 |
| rs894739 | T | C | 12 | 54346869 |  | -0.0762 | 0.2206 | 0.0119763 | 5.20E-10 |  | -0.0232 | 0.2619 | 0.0254 | 0.3615 |  | GCST90454205 | GCST90205223 | TRUE | 3.08E-09 | 0.20% | 38.53 |
| rs9844972 | G | C | 3 | 150097635 |  | 0.1353 | 0.9296 | 0.0197717 | 5.70E-12 |  | 0.0580 | 0.9481 | 0.0494 | 0.2398 |  | GCST90454205 | GCST90205223 | TRUE | 2.51E-10 | 0.24% | 46.23 |
| rs998584 | C | A | 6 | 43757896 |  | 0.0917 | 0.5171 | 0.00999768 | 3.80E-20 |  | 0.0048 | 0.5134 | 0.0213 | 0.8230 |  | GCST90454205 | GCST90205223 | TRUE | 1.13E-18 | 0.42% | 81.35 |
| rs12824567 | G | C | 12 | 124495203 |  | 0.0573 | 0.6882 | 1.03E-02 | 0.000000029 |  | 0.0310 | 0.6971 | 0.0231 | 0.1787 |  | GCST90454205 | GCST90205224 | TRUE | 4.31E-07 | 0.14% | 28.18 |
| rs13322435 | A | G | 3 | 156795468 |  | -0.0786 | 0.5887 | 9.80E-03 | 8.8E-15 |  | 0.0007 | 0.6274 | 0.0218 | 0.9727 |  | GCST90454205 | GCST90205224 | TRUE | 9.65E-15 | 0.30% | 60.01 |
| rs2982521 | A | T | 6 | 139835329 |  | 0.0751 | 0.3714 | 9.88E-03 | 1.5E-13 |  | 0.0241 | 0.4123 | 0.0217 | 0.2667 |  | GCST90454205 | GCST90205224 | TRUE | 1.60E-12 | 0.26% | 52.79 |
| rs4140413 | G | T | 11 | 32459228 |  | 0.0567 | 0.6264 | 9.96E-03 | 0.000000036 |  | 0.0844 | 0.7182 | 0.0238 | 0.0004 |  | GCST90454205 | GCST90205224 | TRUE | 4.14E-06 | 0.15% | 30.16 |
| rs577721086 | T | C | 6 | 127440047 |  | -0.1766 | 0.9521 | 2.26E-02 | 1.4E-14 |  | -0.1118 | 0.9417 | 0.0473 | 0.0181 |  | GCST90454205 | GCST90205224 | TRUE | 3.56E-12 | 0.28% | 57.00 |
| rs6974288 | A | G | 7 | 130424212 |  | 0.0561 | 0.5142 | 9.68E-03 | 7.5E-09 |  | 0.0395 | 0.5223 | 0.0215 | 0.0660 |  | GCST90454205 | GCST90205224 | TRUE | 2.78E-07 | 0.16% | 31.50 |
| rs73221948 | G | T | 8 | 25464670 |  | 0.1086 | 0.7085 | 1.10E-02 | 7E-22 |  | -0.0149 | 0.7415 | 0.0256 | 0.5600 |  | GCST90454205 | GCST90205224 | TRUE | 7.46E-21 | 0.49% | 97.88 |
| rs7738895 | C | T | 6 | 19968313 |  | 0.0634 | 0.7281 | 1.07E-02 | 6.6E-09 |  | 0.0023 | 0.7048 | 0.0264 | 0.9318 |  | GCST90454205 | GCST90205224 | TRUE | 1.34E-08 | 0.16% | 31.85 |
| rs8107837 | T | C | 19 | 33893451 |  | -0.0773 | 0.5749 | 9.69E-03 | 7.4E-15 |  | -0.0023 | 0.5728 | 0.0214 | 0.9156 |  | GCST90454205 | GCST90205224 | TRUE | 1.63E-14 | 0.29% | 58.46 |
| rs916485 | T | C | 2 | 25082273 |  | 0.0594 | 0.5539 | 9.69E-03 | 5.6E-09 |  | -0.0057 | 0.6008 | 0.0217 | 0.7936 |  | GCST90454205 | GCST90205224 | TRUE | 4.64E-09 | 0.17% | 34.92 |
| rs10221833 | G | C | 2 | 165577164 |  | 0.0863 | 0.8872 | 1.51E-02 | 9.2E-09 |  | 0.0171 | 0.8901 | 0.0329 | 0.6031 |  | GCST90454205 | GCST90205225 | TRUE | 7.24E-08 | 0.15% | 29.82 |
| rs11992444 | G | T | 8 | 25464690 |  | -0.0570 | 0.4912 | 9.69E-03 | 0.000000022 |  | 0.0100 | 0.4706 | 0.0226 | 0.6576 |  | GCST90454205 | GCST90205225 | TRUE | 2.50E-08 | 0.16% | 32.48 |
| rs35169799 | C | T | 11 | 64031241 |  | -0.1079 | 0.9352 | 1.95E-02 | 0.000000029 |  | 0.0167 | 0.9142 | 0.0390 | 0.6695 |  | GCST90454205 | GCST90205225 | TRUE | 1.69E-07 | 0.14% | 28.24 |
| rs3786901 | A | C | 19 | 33897478 |  | -0.0568 | 0.5748 | 9.79E-03 | 0.000000017 |  | -0.0020 | 0.5728 | 0.0214 | 0.9240 |  | GCST90454205 | GCST90205225 | TRUE | 2.25E-08 | 0.16% | 31.61 |
| rs577721086 | T | C | 6 | 127440047 |  | -0.1752 | 0.9521 | 2.28E-02 | 4.5E-14 |  | -0.1118 | 0.9417 | 0.0473 | 0.0181 |  | GCST90454205 | GCST90205225 | TRUE | 9.09E-12 | 0.28% | 56.10 |
| rs7133378 | G | A | 12 | 124409502 |  | 0.0799 | 0.6796 | 1.03E-02 | 5.5E-14 |  | 0.0415 | 0.7070 | 0.0233 | 0.0746 |  | GCST90454205 | GCST90205225 | TRUE | 1.72E-12 | 0.28% | 55.77 |
| rs10221833 | G | C | 2 | 165577164 |  | 0.0830 | 0.8872 | 1.53E-02 | 0.000000039 |  | 0.0171 | 0.8901 | 0.0329 | 0.6031 |  | GCST90454205 | GCST90205226 | TRUE | 2.97E-07 | 0.14% | 27.60 |
| rs2645288 | G | C | 1 | 119500483 |  | -0.0680 | 0.2145 | 1.19E-02 | 0.000000046 |  | -0.0217 | 0.1086 | 0.0330 | 0.5113 |  | GCST90454205 | GCST90205226 | TRUE | 8.15E-08 | 0.16% | 31.22 |
| rs342314 | T | C | 4 | 157806758 |  | 0.0547 | 0.6719 | 1.04E-02 | 0.000000028 |  | 0.0280 | 0.7756 | 0.0255 | 0.2712 |  | GCST90454205 | GCST90205226 | TRUE | 1.62E-06 | 0.13% | 26.39 |
| rs3936510 | G | T | 5 | 55860866 |  | -0.1366 | 0.8006 | 1.22E-02 | 3.6E-26 |  | -0.0784 | 0.8635 | 0.0308 | 0.0110 |  | GCST90454205 | GCST90205226 | TRUE | 2.51E-24 | 0.60% | 119.64 |
| rs7133378 | G | A | 12 | 124409502 |  | 0.0696 | 0.6796 | 1.04E-02 | 4.9E-11 |  | 0.0415 | 0.7070 | 0.0233 | 0.0746 |  | GCST90454205 | GCST90205226 | TRUE | 1.71E-09 | 0.21% | 42.26 |
| rs744103 | T | A | 6 | 43805362 |  | -0.0679 | 0.3145 | 1.06E-02 | 7.5E-10 |  | -0.0243 | 0.3144 | 0.0235 | 0.3020 |  | GCST90454205 | GCST90205226 | TRUE | 2.53E-09 | 0.20% | 39.81 |
| rs998584 | C | A | 6 | 43757896 |  | -0.0788 | 0.5166 | 9.81E-03 | 6.4E-15 |  | 0.0048 | 0.5134 | 0.0213 | 0.8230 |  | GCST90454205 | GCST90205226 | TRUE | 1.26E-14 | 0.31% | 62.18 |

| Table S2. Summary of sensitivity results | | | | | | | | | | | | | |
| --- | --- | --- | --- | --- | --- | --- | --- | --- | --- | --- | --- | --- | --- |
| **Exposure** |  | **MR-Egger regression** | | |  | **MR-PRESSO** | | |  | **Cochrane’s Q-IVW** | | | |
|  | **Intercept** | **SE** | ***Pval*** |  | **RSSobs** | ***Pvalglobal test*** | **Outlier** |  | ***I2*** | ***Q*** | ***Q_df*** | ***Q_pval*** |
| GCST90205221 |  | -0.0590677 | 0.0405 | 0.1876 |  | 13.398 | *0.235* | NA |  | 23 | 10.4216534 | 8 | 0.236669039 |
| GCST90205222 |  | -0.1705193 | 0.259 | 0.6294 |  | NA | NA | NA |  | 80 | 10.25360071 | 2 | 0.005935522 |
| GCST90205223 |  | 0.0207562 | 0.0235 | 0.391 |  | 24.546 | *0.153* | NA |  | 26 | 21.73992085 | 16 | 0.15178941 |
| GCST90205224 |  | 0.0201576 | 0.0375 | 0.6057 |  | 22.181 | *0.052* | NA |  | 45 | 18.12444314 | 9 | 0.033756922 |
| GCST90205225 |  | -0.0461009 | 0.0316 | 0.218 |  | 8.65957 | 0.34 | rs9660318 |  | 11 | 5.650908079 | 5 | 0.341681809 |
| GCST90205226 |  | -0.0194441 | 0.0363 | 0.6148 |  | 6.67441 | 0.607 | NA |  | 0 | 4.087186331 | 6 | 0.664878878 |

| Table S3. Summary of reverse analysis results | | |  |  |  |  |  |  |  |
| --- | --- | --- | --- | --- | --- | --- | --- | --- | --- |
| id.exposure | id.outcome | method | nsnp | b | se | or | or_lci95 | or_uci95 | pval |
| GCST90454205 | GCST90205221 | IVW | 8 | 0.023662 | 0.0252764 | 1.0239442 | 0.9744522 | 1.0759498 | 0.3492068 |
| GCST90454205 | GCST90205222 | IVW | 8 | 0.0184434 | 0.0263824 | 1.0186145 | 0.9672811 | 1.0726721 | 0.4845024 |
| GCST90454205 | GCST90205223 | IVW | 8 | -0.036306 | 0.0252732 | 0.9643453 | 0.9177399 | 1.0133175 | 0.1508496 |
| GCST90454205 | GCST90205224 | IVW | 8 | 0.0122971 | 0.0243012 | 1.012373 | 0.9652837 | 1.0617595 | 0.6128369 |
| GCST90454205 | GCST90205225 | IVW | 8 | 0.0355339 | 0.0245316 | 1.0361728 | 0.9875303 | 1.0872112 | 0.1474793 |
| GCST90454205 | GCST90205226 | IVW | 8 | 0.0403027 | 0.0253013 | 1.0411258 | 0.9907551 | 1.0940575 | 0.1111809 |

| Table S4. Replication dataset results summary | | |  |  |  |  |  |  |  |
| --- | --- | --- | --- | --- | --- | --- | --- | --- | --- |
| id.exposure | id.outcome | method | nsnp | b | se | or | or_lci95 | or_uci95 | pval |
| GCST90205221 | GCST90483500 | IVW | 9 | 0.1079614 | 0.115493 | 1.1140048 | 0.8883364 | 1.3970008 | 0.3498977 |
| GCST90205222 | GCST90483500 | IVW | 3 | -0.135796 | 0.3888006 | 0.8730208 | 0.4074468 | 1.8705888 | 0.7268876 |
| GCST90205223 | GCST90483500 | IVW | 17 | -0.259466 | 0.0935277 | 0.7714638 | 0.6422485 | 0.9266761 | 0.0055336 |
| GCST90205224 | GCST90483500 | IVW | 11 | 0.1514116 | 0.1218082 | 1.1634755 | 0.9163724 | 1.4772108 | 0.2138556 |
| GCST90205225 | GCST90483500 | IVW | 9 | 0.2223083 | 0.1445115 | 1.2489564 | 0.9408852 | 1.6578986 | 0.1239646 |
| GCST90205226 | GCST90483500 | IVW | 8 | 0.8578282 | 0.1500883 | 2.3580339 | 1.7570832 | 3.1645195 | 1.09E-08 |


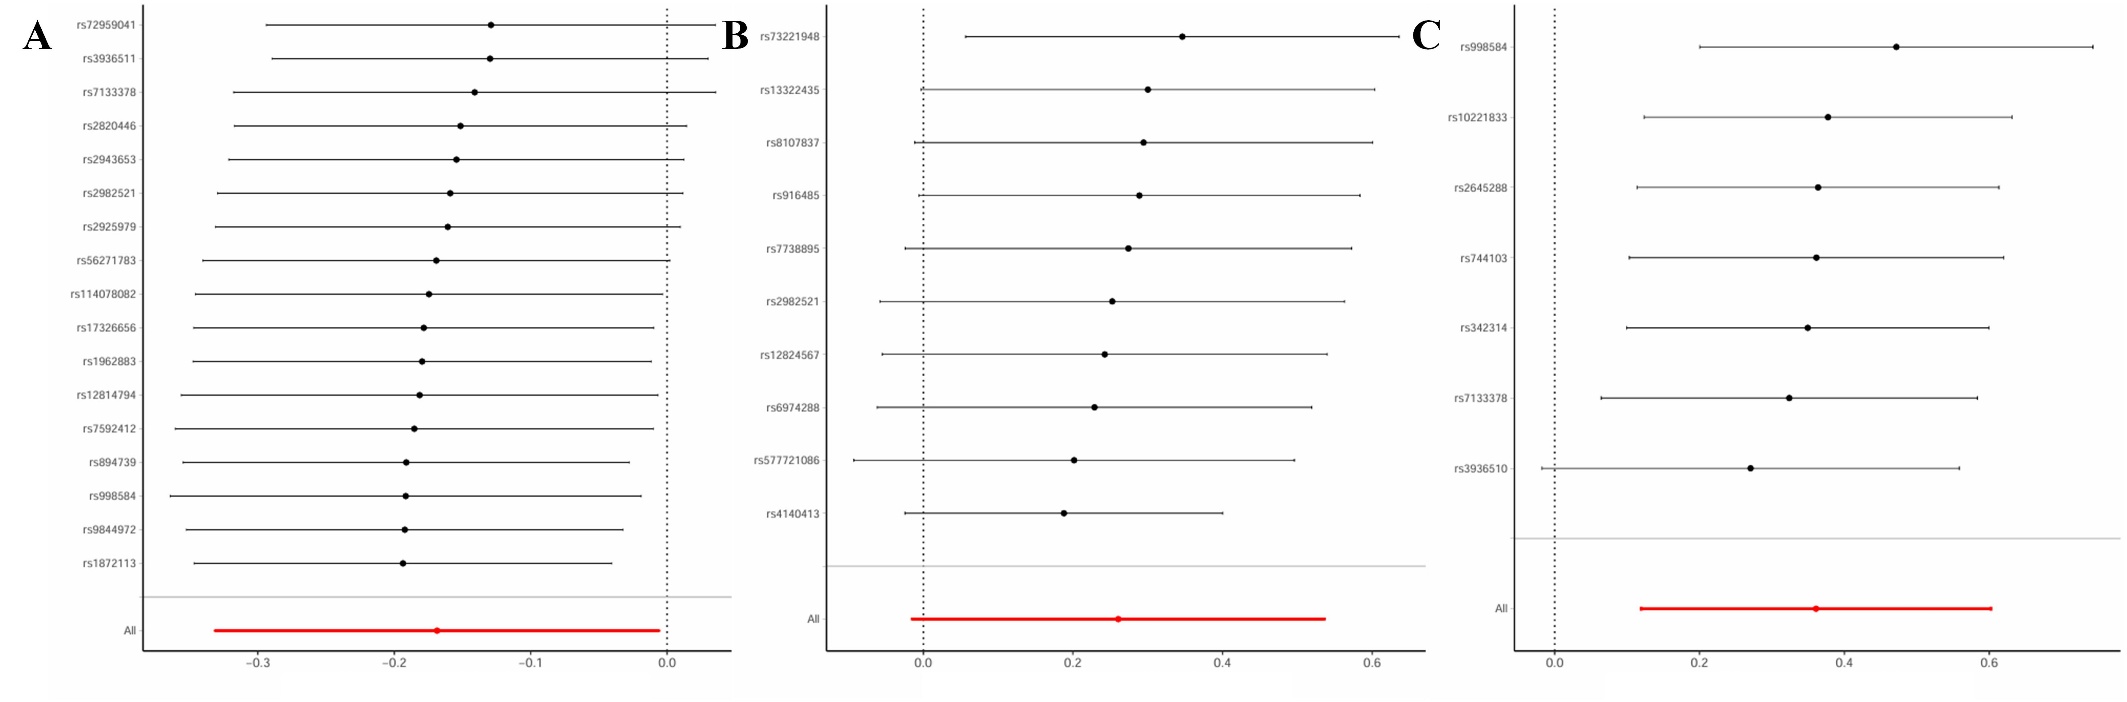


**Fig. S1. Leave-one-out analysis results for positive associations.**
(A) Leave-one-out analysis of the genetically predicted gluteofemoral adipose tissue (GFAT) on polycystic ovary syndrome (PCOS).
(B) Leave-one-out analysis of the genetically predicted visceral-to-abdominal subcutaneous adipose tissue ratio (VAT/ASAT ratio) on PCOS.
(C) Leave-one-out analysis of the genetically predicted abdominal subcutaneous-to-gluteofemoral adipose tissue ratio (ASAT/GFAT ratio) on PCOS.

**STROBE-MR checklist**12

| **Item No.** | **Section** | **Checklist item** | **Page No.** | **Relevant text from manuscript** |
| --- | --- | --- | --- | --- |
| 1 | **TITLE and ABSTRACT** | Indicate Mendelian randomization (MR) as the study’s design in the title and/or the abstract if that is a main purpose of the study | 1 | Beyond BMI: Exploring the Causal Effects and Mediating Pathways of Regional Adipose Tissue Depots on Polycystic Ovary Syndrome |
|  | **INTRODUCTION** |  |  |  |
| 2 | **Background** | Explain the scientific background and rationale for the reported study. What is the exposure? Is a potential causal relationship between exposure and outcome plausible? Justify why MR is a helpful method to address the study question | 3 | Genetic variants used as instrumental variables (IVs) follow a random distribution similar to randomized controlled trials when transmitted from parents and are independent of environmental and other genetic factors, thus minimizing traditional confounding |
| 3 | **Objectives** | State specific objectives clearly, including pre-specified causal hypotheses (if any). State that MR is a method that, under specific assumptions, intends to estimate causal effects | 3-4 | The study aims to elucidate the causal effects of regional fat depots on PCOS and identify modifiable mediators, providing scientific evidence for understanding PCOS pathogenesis and developing targeted prevention and intervention strategies. |
|  | **METHODS** |  |  |  |
| 4 | **Study design and data sources** | Present key elements of the study design early in the article. Consider including a table listing sources of data for all phases of the study. For each data source contributing to the analysis, describe the following: | 4 | The exposures considered in this study are MRI-derived volumes of GFAT, ASAT, and VAT, adjusted for BMI and height. Initially, two-sample MR analyses were conducted to assess their causal relationships with PCOS. Additionally, the study evaluated three fat distribution ratios—VAT/ASAT, VAT/GFAT, and ASAT/GFAT—to comprehensively represent the relative distribution patterns among various anatomical regions and potentially offer additional explanatory power beyond individual fat volumes. For exposures demonstrating significant causal associations, genetic mediation analyses were further conducted to explore the roles of five potential mediator categories: sex hormone levels, lipid metabolic characteristics, glucose metabolism traits, adipose-specific factors, and inflammatory markers. Moreover, reverse causality analyses were performed to assess whether PCOS could causally affect fat distribution. |
|  | a) | Setting: Describe the study design and the underlying population, if possible. Describe the setting, locations, and relevant dates, including periods of recruitment, exposure, follow-up, and data collection, when available. | 4-5 | Selection of Genetic Instruments and Data Sources |
|  | b) | Participants: Give the eligibility criteria, and the sources and methods of selection of participants. Report the sample size, and whether any power or sample size calculations were carried out prior to the main analysis | 4-5 | Selection of Genetic Instruments and Data Sources |
|  | c) | Describe measurement, quality control and selection of genetic variants | 4-5 | Selection of Genetic Instruments and Data Sources |
|  | d) | For each exposure, outcome, and other relevant variables, describe methods of assessment and diagnostic criteria for diseases | 4-5 | Selection of Genetic Instruments and Data Sources |
|  | e) | Provide details of ethics committee approval and participant informed consent, if relevant | 4 | All data utilized in this study were publicly available GWAS summary statistics. Ethical approval, clinical registration, and patient consent were previously obtained in original studies; therefore, additional ethical approval for the current secondary analysis was unnecessary. Detailed data sources are summarized in Table 1. |
| 5 | **Assumptions** | Explicitly state the three core IV assumptions for the main analysis (relevance, independence and exclusion restriction) as well assumptions for any additional or sensitivity analysis | 4 | Selection of single nucleotide polymorphisms (SNPs) from large-scale genome-wide association study (GWAS) data adheres to the three core assumptions of MR: 1) relevance, with significant associations to exposure phenotypes; 2) independence from confounding factors; and 3) exclusivity of effects on outcomes through exposure pathways only |
| 6 | **Statistical methods: main analysis** | Describe statistical methods and statistics used |  |  |
|  | a) | Describe how quantitative variables were handled in the analyses (i.e., scale, units, model) | 5 | Due to the inverse-normal transformation applied to regional adiposity phenotypes in the original GWAS, MR analyses reported causal relationships per standard deviation (SD) unit increase in adipose volumes or corresponding ratios. |
|  | b) | Describe how genetic variants were handled in the analyses and, if applicable, how their weights were selected | 5 | Inverse variance weighting (IVW) was the primary analytical method[25]. Heterogeneity was assessed using Cochran’s Q test and quantified by I² statistics to guide method selection[26]. Supplementary analyses included MR-Egger, Weighted Median, dIVW[27], cML, and BWMR[28]]. |
|  | c) | Describe the MR estimator (e.g. two-stage least squares, Wald ratio) and related statistics. Detail the included covariates and, in case of two-sample MR, whether the same covariate set was used for adjustment in the two samples | 5 | Inverse variance weighting (IVW) was the primary analytical method[25]. Heterogeneity was assessed using Cochran’s Q test and quantified by I² statistics to guide method selection[26]. Supplementary analyses included MR-Egger, Weighted Median, dIVW[27], cML, and BWMR[28]]. |
|  | d) | Explain how missing data were addressed | 4 | When SNPs from the exposure data were absent in the outcome datasets, the TwoSampleMR package automatically identified proxy SNPs. |
|  | e) | If applicable, indicate how multiple testing was addressed | 5 | False discovery rate (FDR) correction via the Benjamini-Hochberg procedure identified significant causal evidence (PFDR-IVW and p-value both <0.05) and suggestive evidence (p-value <0.05, PFDR-IVW >0.05). |
| 7 | **Assessment of assumptions** | Describe any methods or prior knowledge used to assess the assumptions or justify their validity | 5 | Horizontal pleiotropy was examined using MR-Egger regression[29] and MR-PRESSO[30], with leave-one-out analyses verifying robustness of positive findings. |
| 8 | **Sensitivity analyses and additional analyses** | Describe any sensitivity analyses or additional analyses performed (e.g. comparison of effect estimates from different approaches, independent replication, bias analytic techniques, validation of instruments, simulations) | 5 | Given limitations in single-cohort representativeness and statistical power, causal effects from two cohorts were combined using the "meta" package, applying stringent Bonferroni correction (significant if p-value <0.00416 [0.05/12]). Considering limited statistical power compared to observational studies, explained variance (R²) of exposure variables was calculated, and two-sample outcome statistical power was assessed via the online tool mRNA. |
| 9 | **Software and pre-registration** |  |  |  |
|  | a) | Name statistical software and package(s), including version and settings used | 6 | Analyses were conducted in R (version 4.2.3), utilizing packages meta, TwoSampleMR, MVMR, MendelianRandomization, and MRPRESSO. |
|  | b) | State whether the study protocol and details were pre-registered (as well as when and where) | NA |  |
|  | **RESULTS** |  |  |  |
| 10 | **Descriptive data** |  |  |  |
|  | a) | Report the numbers of individuals at each stage of included studies and reasons for exclusion. Consider use of a flow diagram | 6 | This study identified 52 genetic variants associated with BMI and height-independent regional adipose tissue distribution and corresponding ratios. Phenotypic variance explained (R²) ranged from 0.87% to 4.80%: 9 SNPs for VAT (R²≈2.05%), 3 for ASAT (R²≈0.87%), 17 for GFAT (R²≈4.80%), 10 for VAT/ASAT ratio (R²≈2.41%), 6 for VAT/GFAT ratio (R²≈1.17%), and 7 for ASAT/GFAT ratio (R²≈1.74%). One SNP (rs9660318) was identified as an outlier and excluded. Detailed SNP information is provided in Table S1. |
|  | b) | Report summary statistics for phenotypic exposure(s), outcome(s), and other relevant variables (e.g. means, SDs, proportions) | 6 | In the discovery dataset with no sample overlap (Fig. 1), genetically predicted BMI- and height-independent GFAT volumes were significantly associated with a 15.5% reduction in PCOS risk per SD increase (OR=0.845, 95% CI: 0.735–0.971, PFDR =0.036). Additionally, higher VAT/ASAT and ASAT/GFAT ratios were significantly associated with increased PCOS risk (OR=1.298 per SD increase, 95% CI: 1.069–1.576, PFDR =0.027; OR=1.435 per SD increase, 95% CI: 1.127–1.826, PFDR =0.018, respectively). |
|  | c) | If the data sources include meta-analyses of previous studies, provide the assessments of heterogeneity across these studies | NA |  |
|  | d) | For two-sample MR:  i.  Provide justification of the similarity of the genetic variant-exposure associations between the exposure and outcome samples  ii.  Provide information on the number of individuals who overlap between the exposure and outcome studies | 5,6 | The PCOS datasets included discovery and replication cohorts. The discovery dataset originated from Gualdo et al. (5,171 cases and 283,185 controls), derived from the Estonian Biobank and FinnGen consortium without sample overlap with exposure data,All selected SNPs passed the Steiger directionality test, ensuring the correct direction of association, and demonstrated F-statistics greater than 10, indicating robust genetic instruments. |
| 11 | **Main results** |  |  |  |
|  | a) | Report the associations between genetic variant and exposure, and between genetic variant and outcome, preferably on an interpretable scale | 6-7 | Two-Sample Mendelian Randomization Analysis |
|  | b) | Report MR estimates of the relationship between exposure and outcome, and the measures of uncertainty from the MR analysis, on an interpretable scale, such as odds ratio or relative risk per SD difference | 6-7 | Two-Sample Mendelian Randomization Analysis |
|  | c) | If relevant, consider translating estimates of relative risk into absolute risk for a meaningful time period | 6-7 | Two-Sample Mendelian Randomization Analysis |
|  | d) | Consider plots to visualize results (e.g. forest plot, scatterplot of associations between genetic variants and outcome versus between genetic variants and exposure) | 6-7 | Two-Sample Mendelian Randomization Analysis |
| 12 | **Assessment of assumptions** |  |  |  |
|  | a) | Report the assessment of the validity of the assumptions | 6 | The remaining SNPs satisfied the three core MR assumptions. |
|  | b) | Report any additional statistics (e.g., assessments of heterogeneity across genetic variants, such as *I2*, Q statistic or E-value) | 6 | Significant heterogeneity was detected solely in ASAT analyses (I²=80%, Cochran’s Q-p-value =0.005), prompting the use of random-effects models, whereas fixed-effects models were applied in other analyses without heterogeneity evidence. Neither MR-Egger nor MR-PRESSO identified evidence of horizontal pleiotropy (p-value>0.05; Table S2). |
| 13 | **Sensitivity analyses and additional analyses** |  |  |  |
|  | a) | Report any sensitivity analyses to assess the robustness of the main results to violations of the assumptions | 6 | Significant heterogeneity was detected solely in ASAT analyses (I²=80%, Cochran’s Q-p-value =0.005), prompting the use of random-effects models, whereas fixed-effects models were applied in other analyses without heterogeneity evidence. Neither MR-Egger nor MR-PRESSO identified evidence of horizontal pleiotropy (p-value>0.05; Table S2). |
|  | b) | Report results from other sensitivity analyses or additional analyses | 6 | Significant heterogeneity was detected solely in ASAT analyses (I²=80%, Cochran’s Q-p-value =0.005), prompting the use of random-effects models, whereas fixed-effects models were applied in other analyses without heterogeneity evidence. Neither MR-Egger nor MR-PRESSO identified evidence of horizontal pleiotropy (p-value>0.05; Table S2). |
|  | c) | Report any assessment of direction of causal relationship (e.g., bidirectional MR) | 6 | All selected SNPs passed the Steiger directionality test, ensuring the correct direction of association, and demonstrated F-statistics greater than 10, indicating robust genetic instruments. |
|  | d) | When relevant, report and compare with estimates from non-MR analyses | NA |  |
|  | e) | Consider additional plots to visualize results (e.g., leave-one-out analyses) | 6 | Leave-one-out analyses confirmed robustness of GFAT results, but indicated rs73221948 (CDCA2, EBF2) and rs3936510 (C5orf67) drove VAT/ASAT and ASAT/GFAT ratios' associations with PCOS, respectively (Fig. S1). |
|  | **DISCUSSION** |  |  |  |
| 14 | **Key results** | Summarize key results with reference to study objectives | 7 | This MR study extends beyond traditional obesity metrics, such as BMI and WHR, to investigate causal associations and modifiable mediation pathways involving regional adipose tissue depots and ratios in PCOS. Our findings demonstrated robust evidence supporting a protective effect of BMI- and height-independent GFAT volumes against PCOS, mediated through BT, FI, leptin, HOMA-IR, TG, and SHBG. Additionally, suggestive evidence linked elevated VAT/ASAT, VAT/GFAT, and ASAT/GFAT ratios to increased PCOS risk. Reverse causation analyses revealed no evidence of PCOS genetic susceptibility influencing adipose tissue distribution. |
| 15 | **Limitations** | Discuss limitations of the study, taking into account the validity of the IV assumptions, other sources of potential bias, and imprecision. Discuss both direction and magnitude of any potential bias and any efforts to address them | 8-9 | However, this study has several limitations. Consistent with most MR studies, our findings were restricted to European populations, limiting their generalizability. As of June 20, 2025, searches of the GWAS Catalog indicate a lack of accessible summary data from other ethnic populations, such as East Asians. Thus, future studies should adopt our analytical framework using large-scale genetic databases (e.g., China Kadoorie Biobank) to perform GWAS analyses with individual-level data, assessing the replicability of these findings in diverse populations. Additionally, although MR provides robust statistical evidence for causation, triangulation using observational, prospective, and family-based MR studies remains essential to confirm these causal relationships. |
| 16 | **Interpretation** |  |  |  |
|  | a) | Meaning: Give a cautious overall interpretation of results in the context of their limitations and in comparison with other studies | 7-9 | Discussion |
|  | b) | Mechanism: Discuss underlying biological mechanisms that could drive a potential causal relationship between the investigated exposure and the outcome, and whether the gene-environment equivalence assumption is reasonable. Use causal language carefully, clarifying that IV estimates may provide causal effects only under certain assumptions | 7-9 | Discussion |
|  | c) | Clinical relevance: Discuss whether the results have clinical or public policy relevance, and to what extent they inform effect sizes of possible interventions | 7-9 | Discussion |
| 17 | **Generalizability** | Discuss the generalizability of the study results (a) to other populations, (b) across other exposure periods/timings, and (c) across other levels of exposure | 7-9 | Discussion |
|  | **OTHER INFORMATION** |  |  |  |
| 18 | **Funding** | Describe sources of funding and the role of funders in the present study and, if applicable, sources of funding for the databases and original study or studies on which the present study is based |  | Title page |
| 19 | **Data and data sharing** | Provide the data used to perform all analyses or report where and how the data can be accessed, and reference these sources in the article. Provide the statistical code needed to reproduce the results in the article, or report whether the code is publicly accessible and if so, where |  | Title page |
| 20 | **Conflicts of Interest** | All authors should declare all potential conflicts of interest |  | Title page |

This checklist is copyrighted by the Equator Network under the Creative Commons Attribution 3.0 Unported (CC BY 3.0) license.

1. Skrivankova VW, Richmond RC, Woolf BAR, Yarmolinsky J, Davies NM, Swanson SA, et al. Strengthening the Reporting of Observational Studies in Epidemiology using Mendelian Randomization (STROBE-MR) Statement. JAMA. 2021;under review.

2. Skrivankova VW, Richmond RC, Woolf BAR, Davies NM, Swanson SA, VanderWeele TJ, et al. Strengthening the Reporting of Observational Studies in Epidemiology using Mendelian Randomisation (STROBE-MR): Explanation and Elaboration. BMJ. 2021;375:n2233.
